# Supplementary material
Source: Elsevier journal article supplement (https://www.sciencedirect.com/science/article/pii/S2013251423000160)
Supplement: mmc1 [file S2013251423000160:mmc1.docx]

**Tabla suplementaria 1.** Uso concomitante de captores de fósforo en la población de seguridad.

| **Combinaciones de captores de fósforo** | **Conjunto análisis seguridad**  **(N = 148)a** |
| --- | --- |
| Basados en calcio | 46 (31,08%) |
| Sevelámero | 32 (21,62%) |
| Basados en calcio/sevelámero | 27 (18,24%) |
| Basados en calcio/lantano | 17 (11,49%) |
| Lantano | 12 (8,11%) |
| Sevelámero/lantano | 9 (6,08%) |
| Basados en aluminio | 2 (1,35%) |
| Basados en calcio/sevelámero/lantano | 2 (1,35%) |
| Otros | 1 (0,68%) |

aLos porcentajes están calculados respecto al total de pacientes que recibieron tratamiento concomitante con captores de fósforo durante el seguimiento (n = 148).

**Tabla suplementaria 2.** Reacciones adversas a medicamentos serias en la población de seguridad.

|  | **Conjunto análisis seguridad**  **(N = 282)** | |
| --- | --- | --- |
| **Clasificación por órganos y sistemas**  **Término preferente** | **Pacientes (%)** | **Tasa incidencia ajustada por exposición/año**  **[IC 95%]** |
| Pacientes con ≥ 1 RAM seria | 3 (1,06%) | 0,009 [0,002 ; 0,027] |
| Trastornos de la sangre y del sistema linfático | 1 (0,35%) | 0,003 [0,000 ; 0,017] |
| Anemia | 1 (0,35%) | 0,003 [0,000 ; 0,017] |
| Trastornos gastrointestinales | 1 (0,35%) | 0,003 [0,000 ; 0,017] |
| Heces anormales | 1 (0,35%) | 0,003 [0,000 ; 0,017] |
| Trastornos generales y alteraciones en el lugar de administración | 1 (0,35%) | 0,003 [0,000 ; 0,017] |
| Agravamiento de la condición | 1 (0,35%) | 0,003 [0,000 ; 0,017] |
| Infecciones e infestaciones | 1 (0,35%) | 0,003 [0,000 ; 0,017] |
| Infección del tracto respiratorio | 1 (0,35%) | 0,003 [0,000 ; 0,017] |
| Trastornos del sistema nervioso | 1 (0,35%) | 0,003 [0,000 ; 0,017] |
| Polineuropatía | 1 (0,35%) | 0,003 [0,000 ; 0,017] |

La tasa de incidencia ajustada por exposición se define como el número de pacientes con un evento específico dividido por el tiempo total de seguimiento para todos los pacientes.

RAM, reacción adversa a medicamentos; IC 95%, intervalo de confianza al 95%.

**Tabla suplementaria 3.** Eventos fatales en la población de seguridad clasificados por órganos y sistemas y términos preferentes.

|  | **Conjunto análisis seguridad**  **(N = 282)** | |
| --- | --- | --- |
| **Clasificación por órganos y sistemas**  **Término preferente** | **Pacientes (%)a** | **Tasa incidencia ajustada por exposición/año**  **[IC 95%]** |
| Pacientes con ≥1 evento fatal | 24 (8,51%) | | 0,075 | [0,048 ; 0,111] | | --- | --- | |
| Eventos cardiacos | 11 (3,90%) | | 0,034 | [0,017 ; 0,061] | | --- | --- | |
| Infarto agudo de miocardio | 3 (1,06%) | | 0,009 | [0,002 ; 0,027] | | --- | --- | |
| Arresto cardiaco | 3 (1,06%) | | 0,009 | [0,002 ; 0,027] | | --- | --- | |
| Arresto cardiorrespiratorio | 3 (1,06%) | | 0,009 | [0,002 ; 0,027] | | --- | --- | |
| Trastornos generales y alteraciones en el lugar de administración | 6 (2,13%) | | 0,019 | [0,007 ; 0,041] | | --- | --- | |
| Infecciones e infestaciones | 4 (1,42%) | | 0,012 | [0,003 ; 0,032] | | --- | --- | |
| Trastornos gastrointestinales | 3 (1,06%) | | 0,009 | [0,002 ; 0,027] | | --- | --- | |

aEventos fatales registrados en ≥1,0% de los pacientes.

La tasa de incidencia ajustada por exposición se define como el número de pacientes con un evento específico dividido por el tiempo total de seguimiento para todos los pacientes.

IC 95%, intervalo de confianza al 95%.

**Figura suplementaria 1.** Niveles de ferritina durante el periodo de observación en función del tratamiento concomitante con hierro oral o intravenoso.


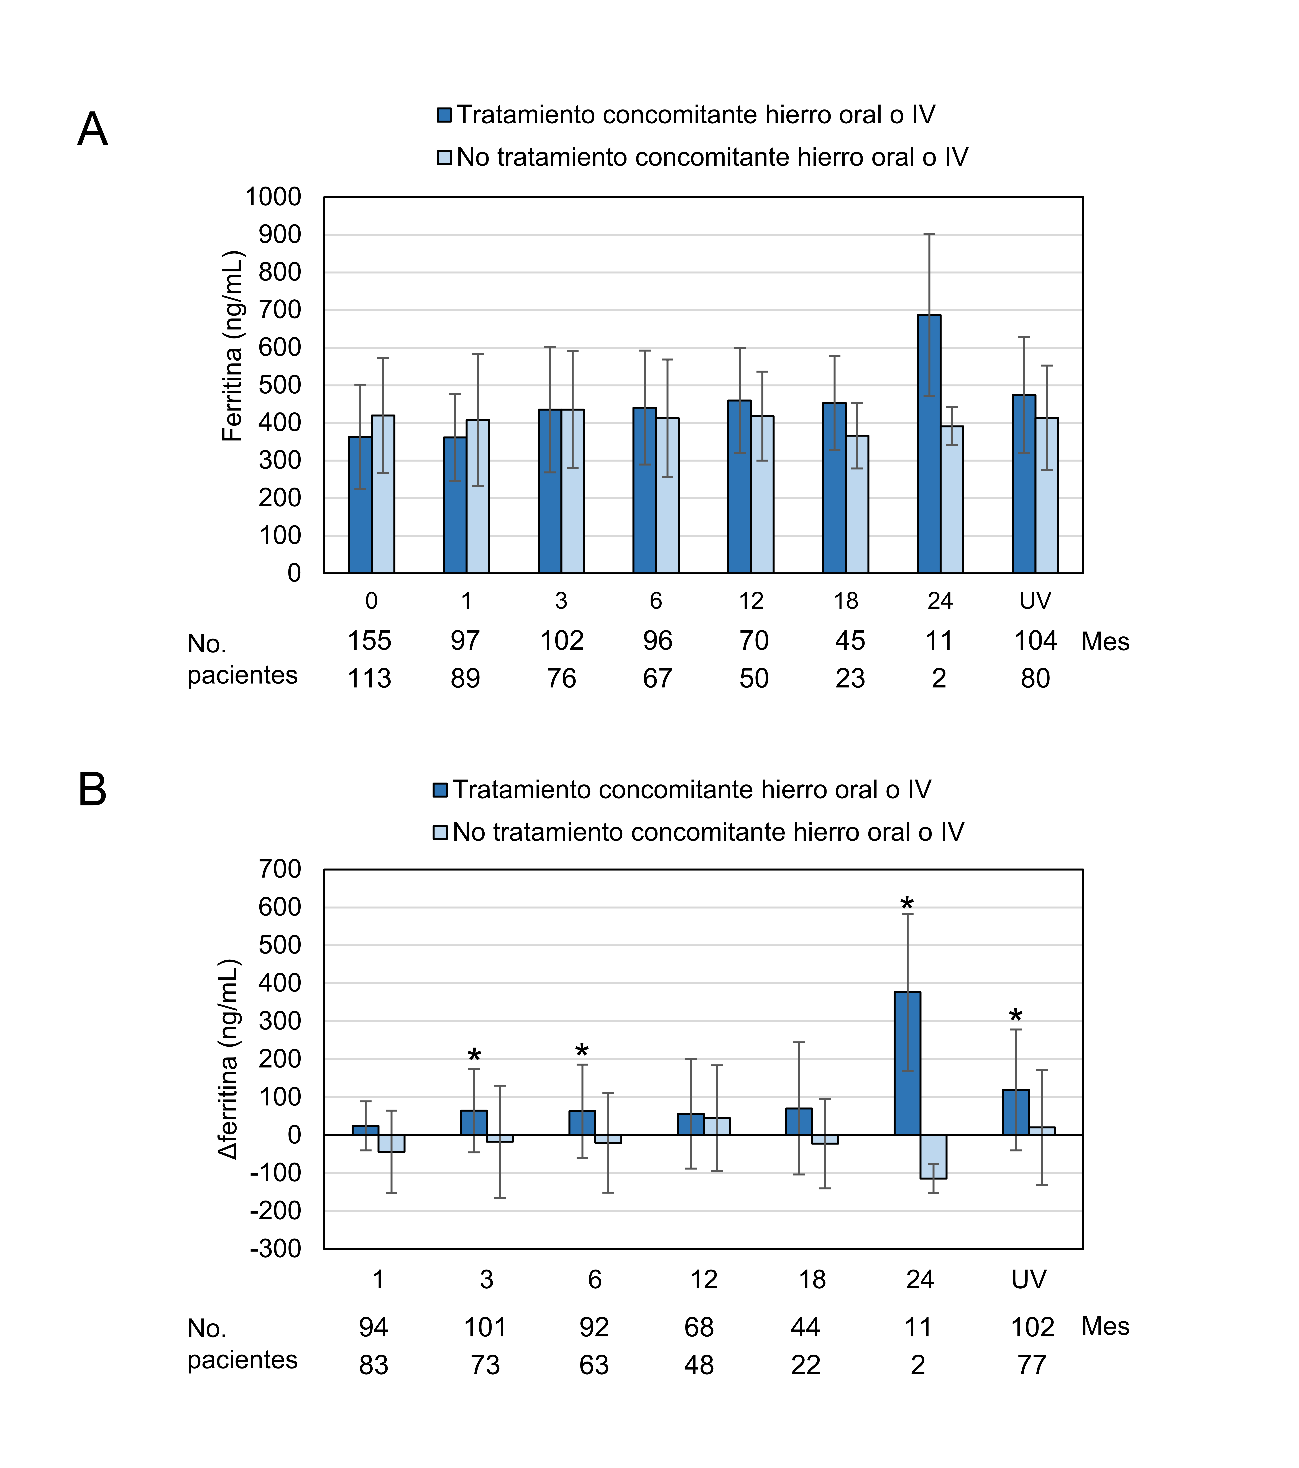


1. Media ± desviación estándar (DE) de los niveles de ferritina durante el periodo de observación (meses) en el conjunto de análisis de seguridad (n = 282) en pacientes que habían recibido o no tratamiento concomitante con hierro oral o intravenoso. (B) Diferencia respecto al valor basal en los niveles de ferritina. * p ≤ 0,05 respecto a la visita basal. UV, última visita; IV, intravenoso.

**Figura suplementaria 2.** Parámetros relacionados con el trastorno mineral y óseo asociado a la ERC durante el periodo de observación.


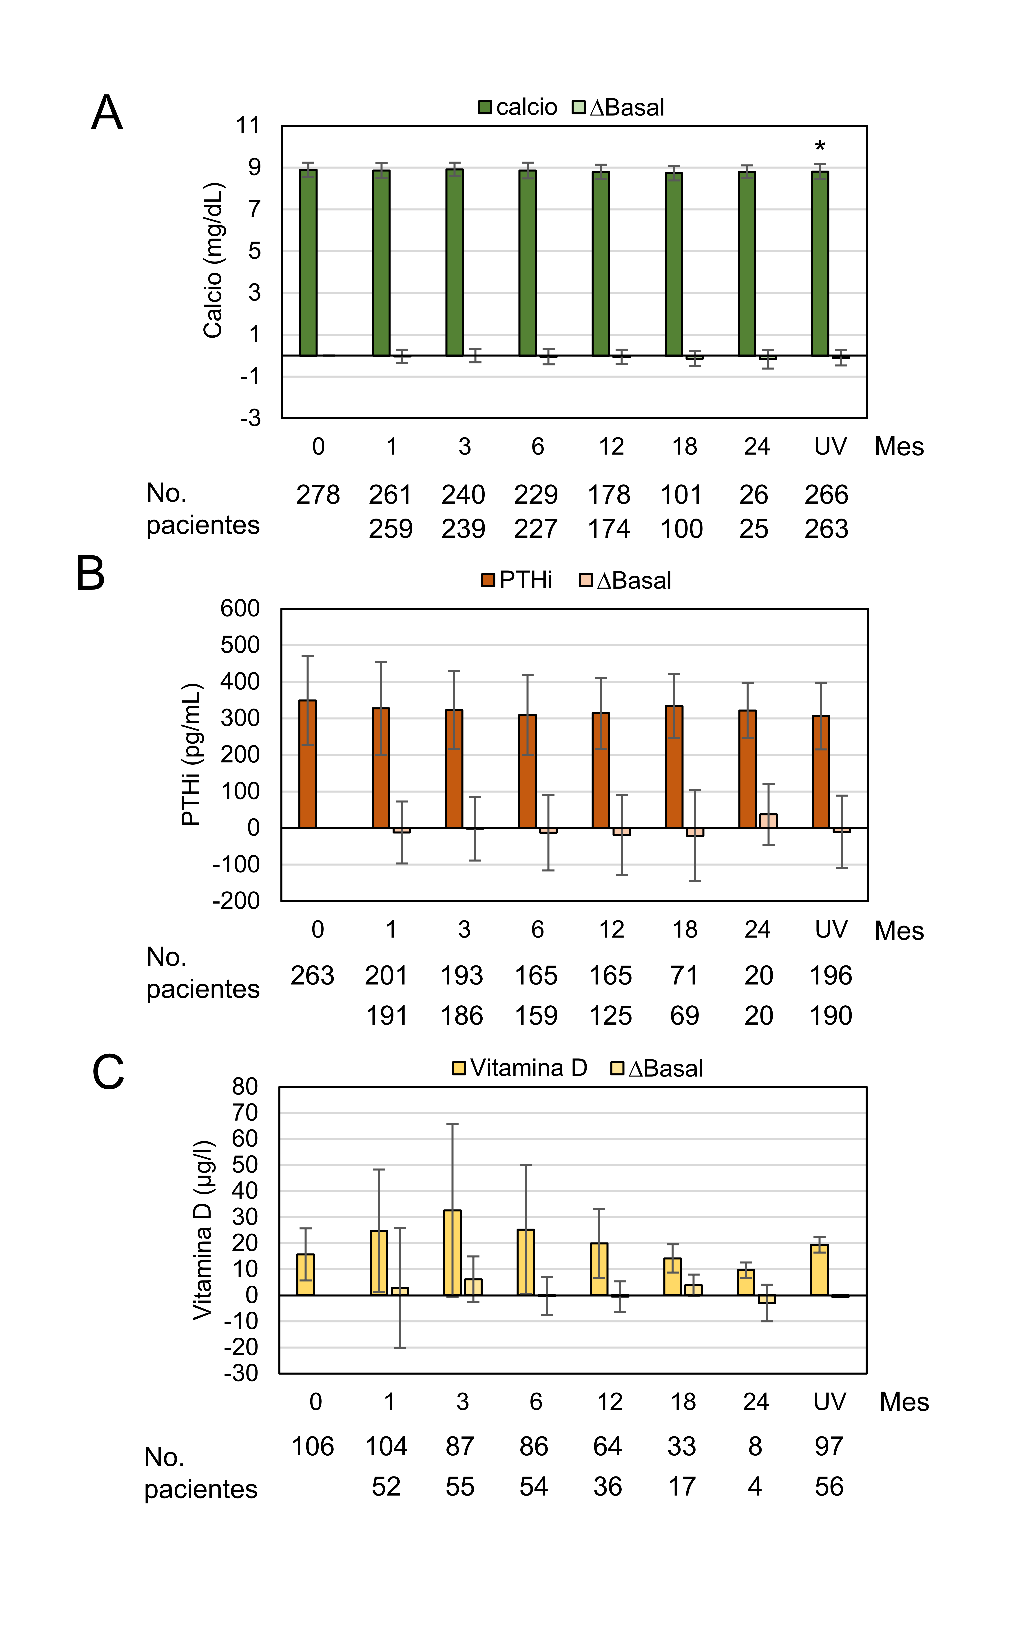


Los gráficos muestran la media ± desviación estándar (DE) y los cambios respecto al valor basal durante el periodo de observación (meses) en el conjunto de análisis de seguridad (n = 282) para: (A) calcio, (B) PTHi, (C) 25-hidroxi vitamina D. * p ≤ 0,05 respecto a la visita basal. PTHi, hormona paratiroidea intacta, UV, última visita.
